# Supplementary material for: Thrombin Generation Assay Detects Moderate-Intensity Statin-Induced Reduction of Hypercoagulability in Diabetes
Source: PubMed Central journal article supplement — Clin Appl Thromb Hemost. 2018 Apr 18;24(7):1095–101. doi: 10.1177/1076029618766254 (PMC6714759; doi:10.1177/1076029618766254), 2018-04-18
Supplement: 180125_supplementary_Tables.pdf [file 180125_supplementary_Tables.pdf]

- 1 Supplementary Table 1. Comparison of thrombin generation assay for patients with factor
- 2 levels of lower quarter range with those with upper quarter range

|                    | Fibrinogen    |                | Factor V      |               | Factor X      |               |
|--------------------|---------------|----------------|---------------|---------------|---------------|---------------|
|                    | Lower quarter | Upper quarter  | Lower quarter | Upper quarter | Lower quarter | Upper quarter |
| Lag time (min)     | 3.3±1.2       | 6.5±2.5**      | 5.4±2.4       | 6.5±2.5       | 5.1±2.6       | 4.6±2.1       |
| Peak thrombin (nM) | 107.5±37.9    | 168.5±43.5**   | 139.5±57.5    | 156.2±53.0    | 145.0±49.9    | 152.3±31.1    |
| ETP (nM·min)       | 594±194.7     | 1237.0±281.7** | 932.1±390.5   | 998.8±413.1   | 945.2±17.8    | 1075.4±354.6  |

3 Results are shown as mean ± standard deviation. \*  $P < 0.01$ , \*\*  $P < 0.001$  versus upper quarter.

4 Abbreviations: Peak thrombin, peak thrombin concentration; ETP, endogenous thrombin potential.
